# Supplementary material for: Quantitative and Qualitative HPLC Analysis of Mycosporine-Like Amino Acids Extracted in Distilled Water for Cosmetical Uses in Four Rhodophyta
Source: PubMed Central journal article supplement (PMC7024326; doi:10.3390/md18010027), 2019-12-28
Supplement: marinedrugs-18-00027-s001.pdf [file marinedrugs-18-00027-s001.pdf]

## Supplementary materials

# Quantitative and Qualitative HPLC Analysis of Mycosporine-Like Amino Acids Extracted in Distilled Water for Cosmetical Uses in Four Rhodophyta

Patricia Chaves-Peña <sup>1</sup>, Francisca de la Coba <sup>2</sup>, Felix L. Figueroa <sup>1</sup> and Nathalie Korbee <sup>1,\*</sup>

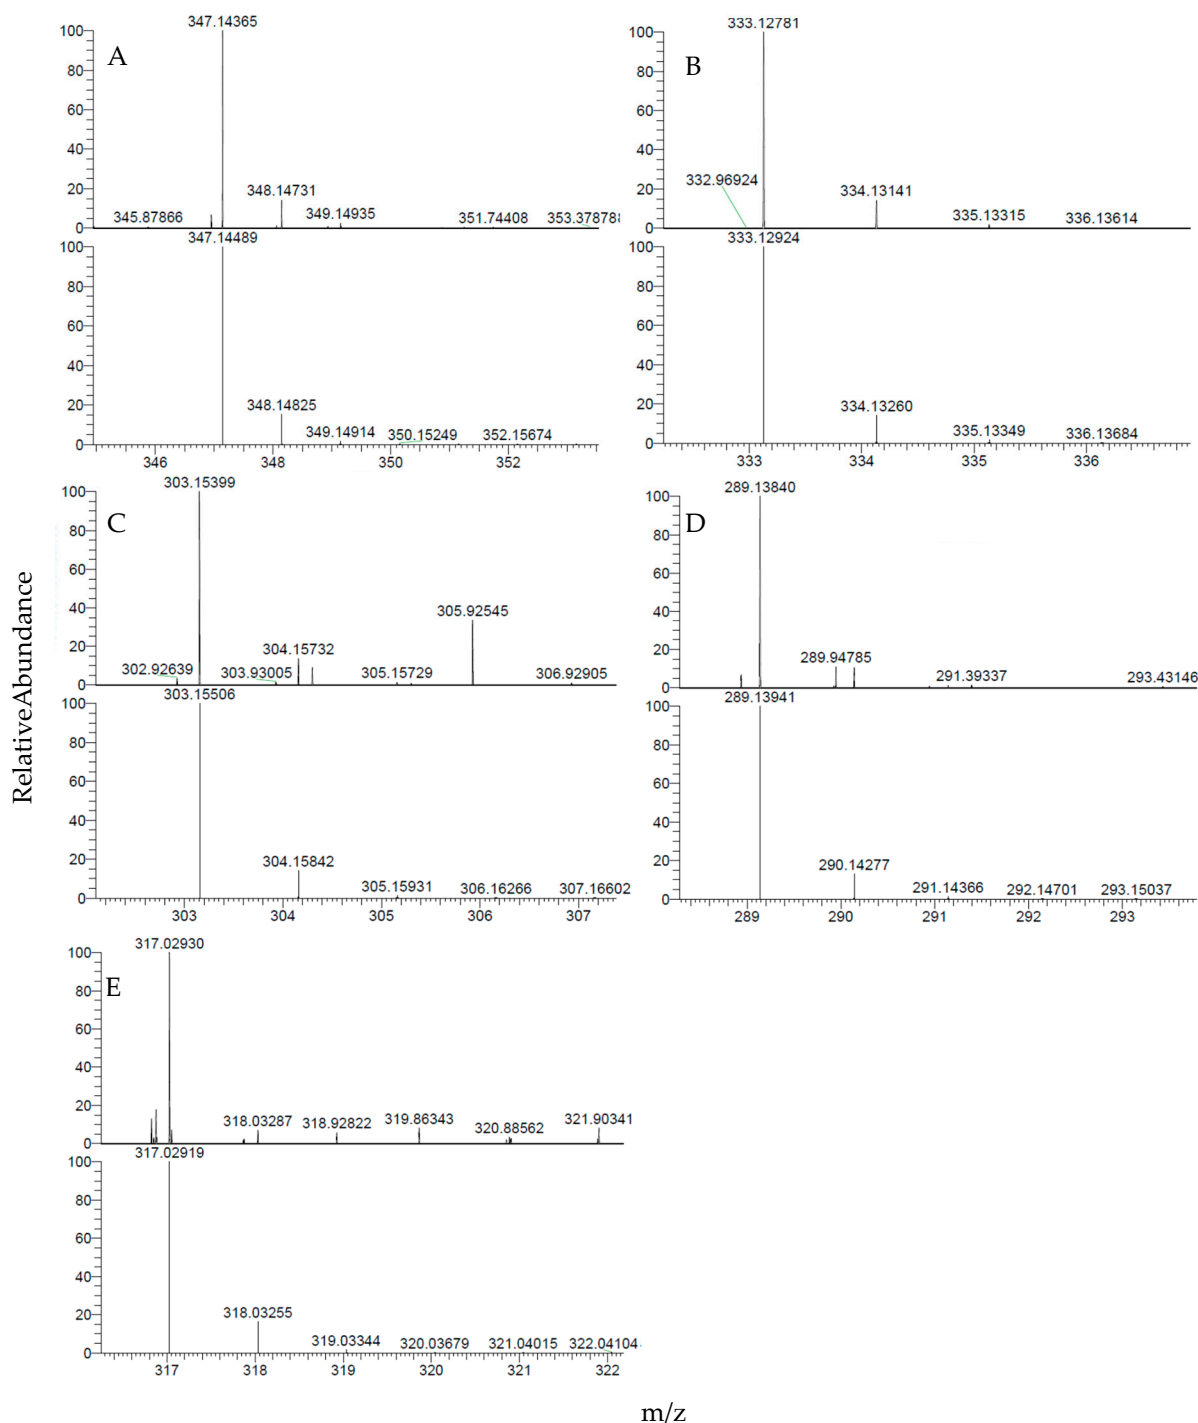

**Figure S1.** Mass spectrum of A (porphyra-334), B (shinorine), C (palythine), D (asterina-330) and E (myricetin) in *Agarophyton vermiculophyllum*.

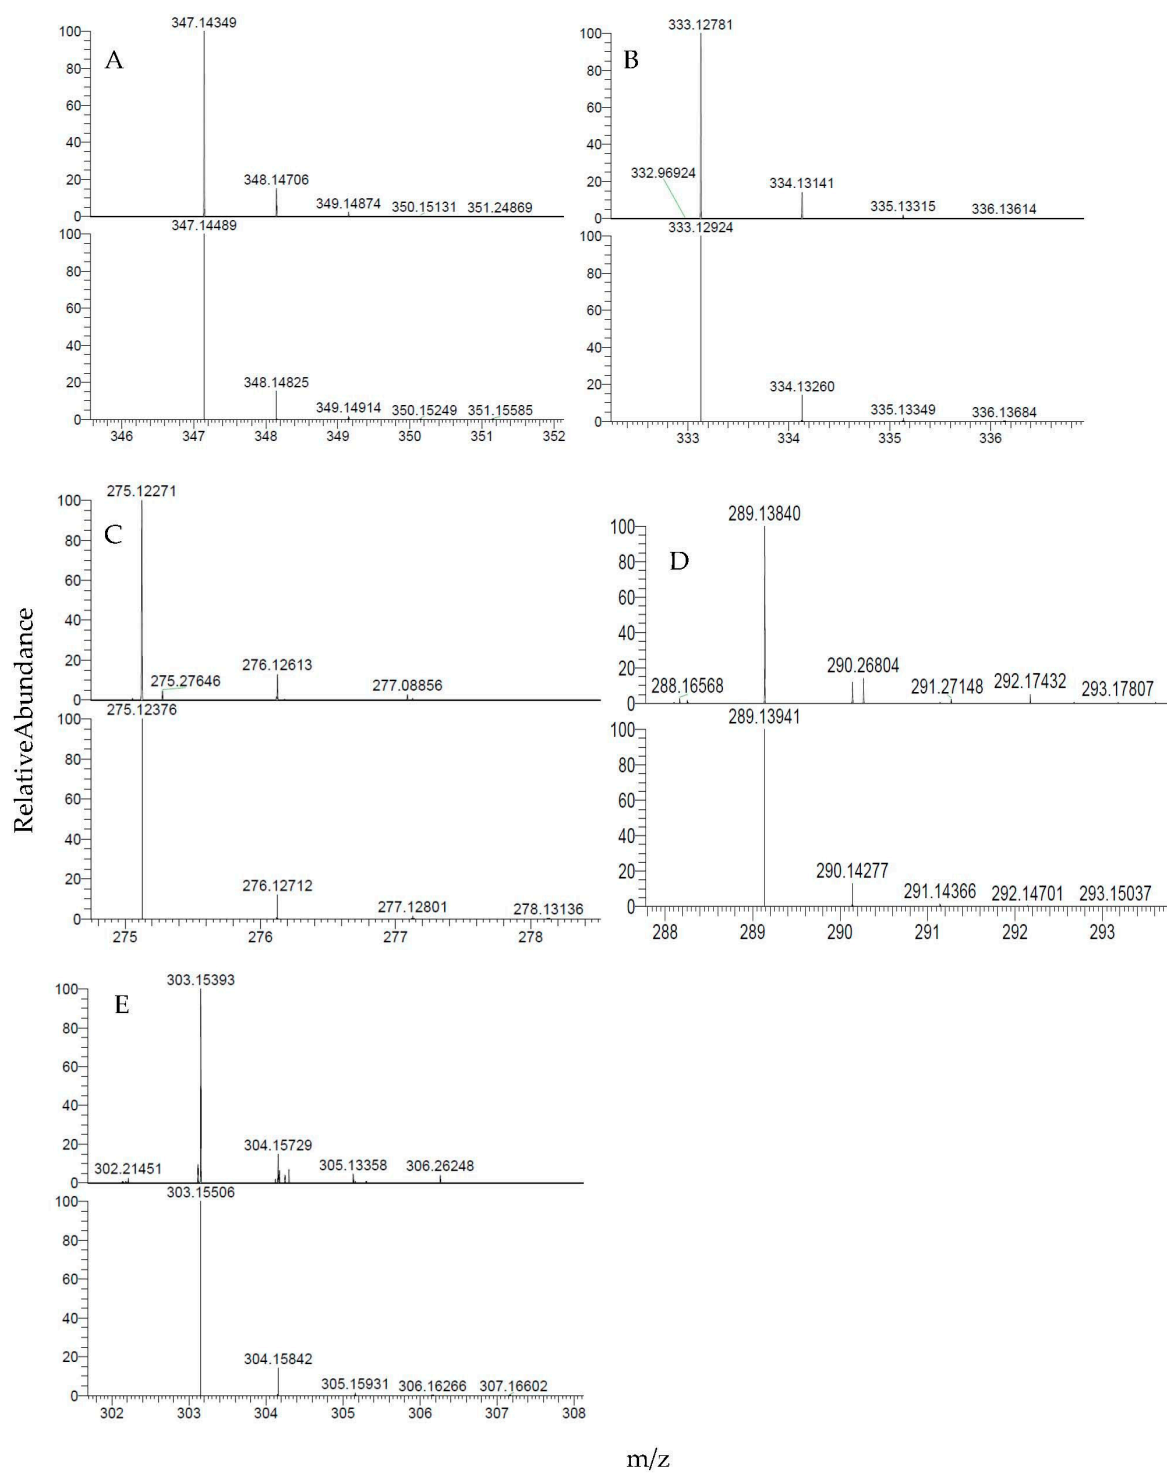

**Figure S2.** Mass spectrum of A (porphyra-334), B (shinorine), C (palythine-serine), D (asterina-330) and E (palythanol) in *Crassiphycus corneus*.

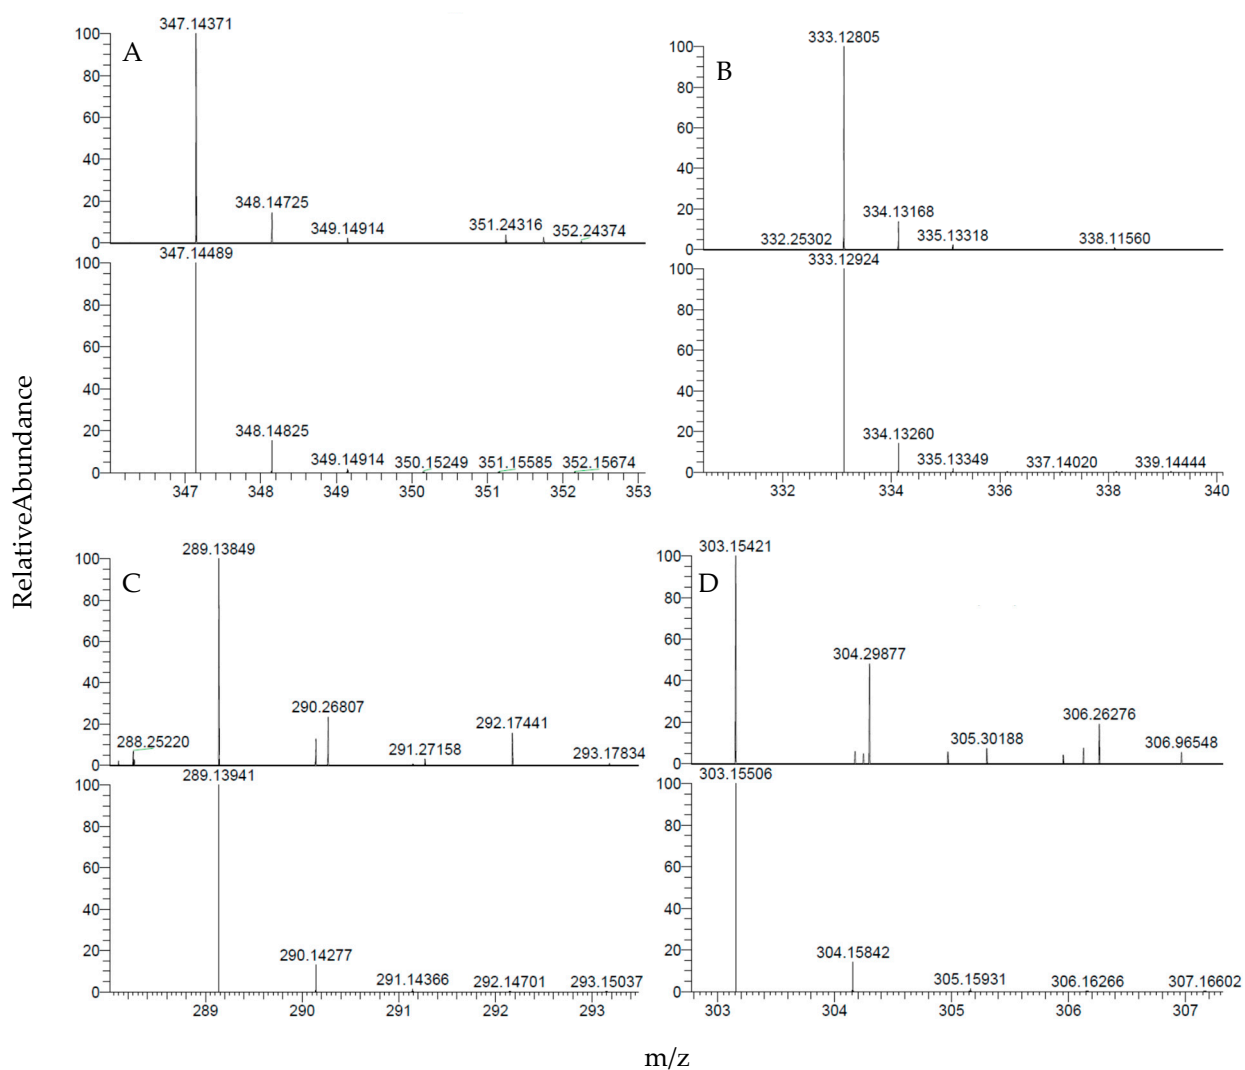

**Figure S3.** Mass spectrum of A (porphyra-334), B (shinorine), C (asterina-330) and D (palythanol) in *Gracilariopsis longissima*.

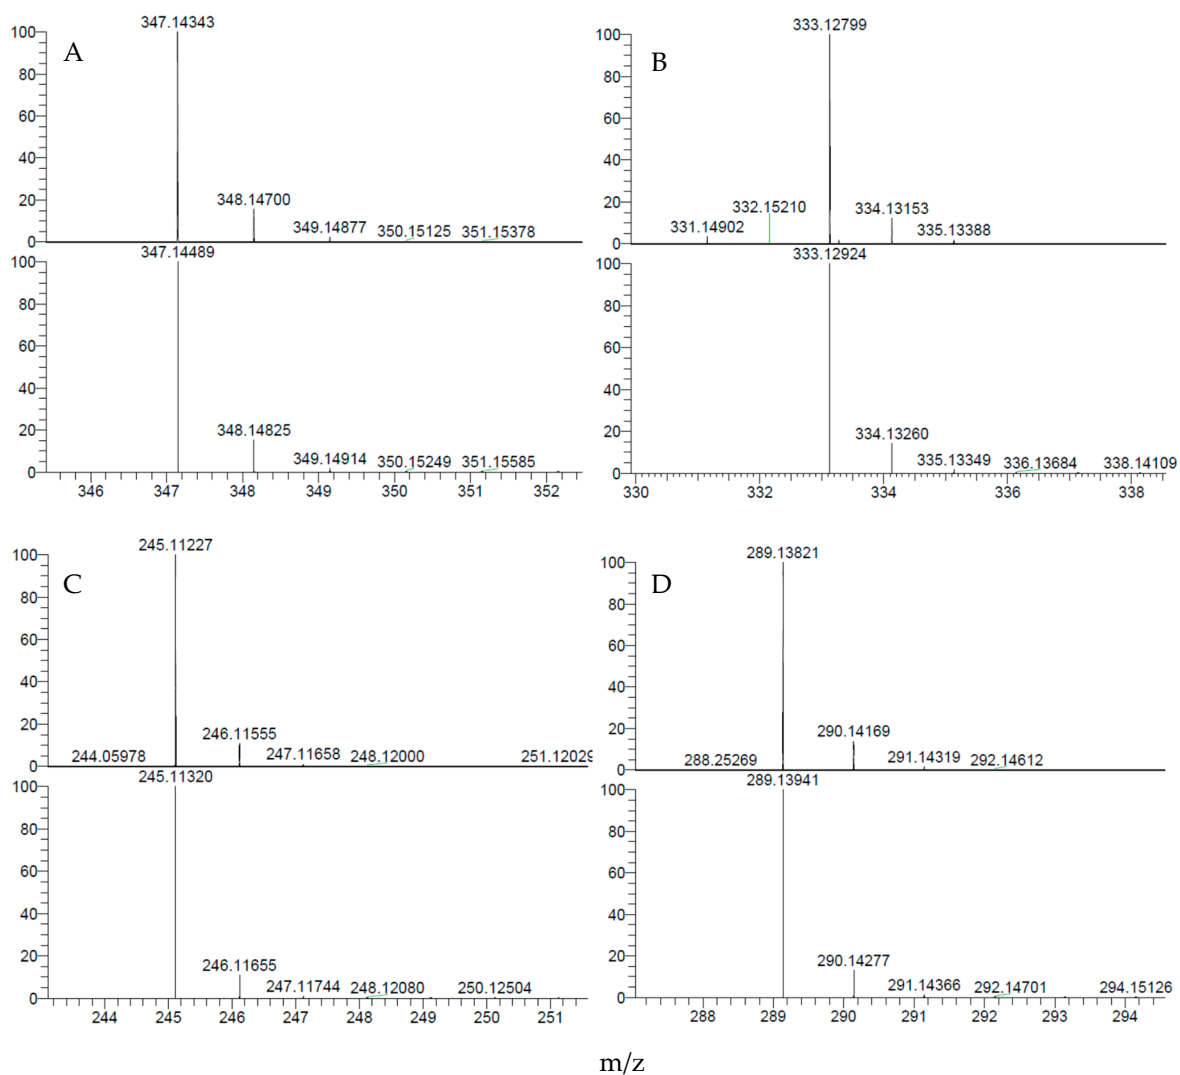

**Figure S4.** Mass spectrum of A (porphyra-334), B (shinorine), C (palythine) and D (asterina-330) in *Pyropia leucosticta*.

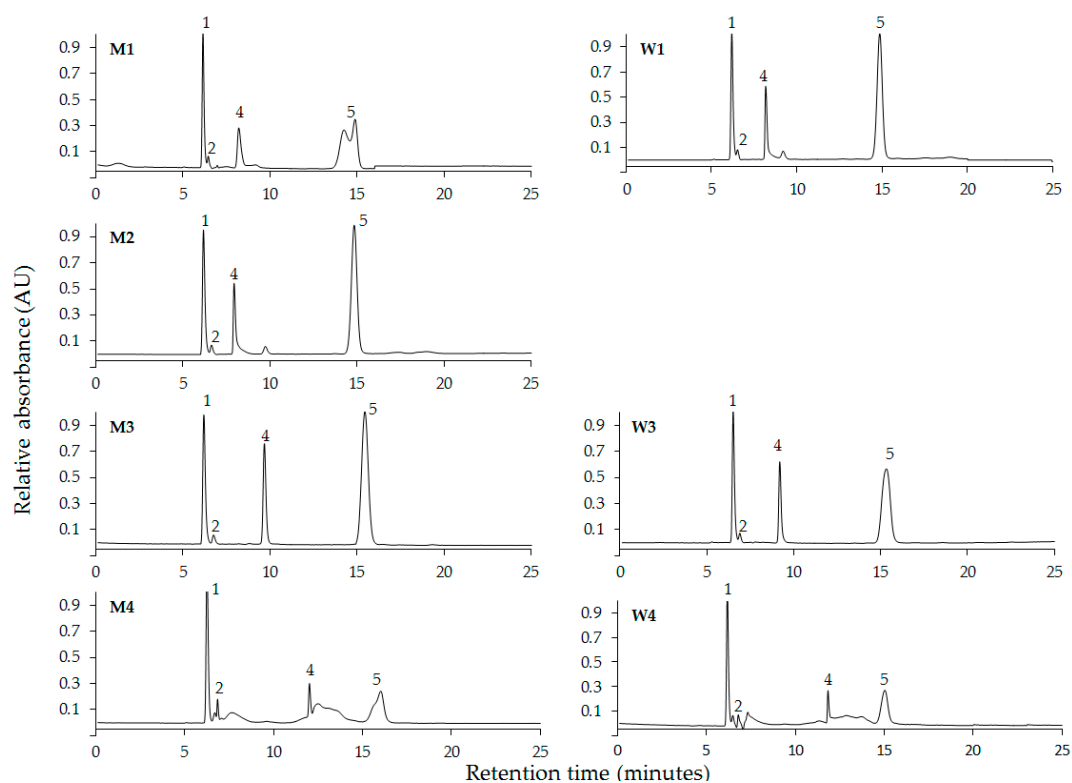

**Figure S5.** HPLC normalized chromatograms of MAAs identified in *Agarophyton vermiculophyllum* by seven methodological protocols using the Luna-C8 column. The code of protocol is indicated based on extraction and re-dissolution solvents used (see figure 1 legend). Numbers indicate: 1 (palythine), 2 (asterina-330), 4 (shinorine), and 5 (porphyra-334).

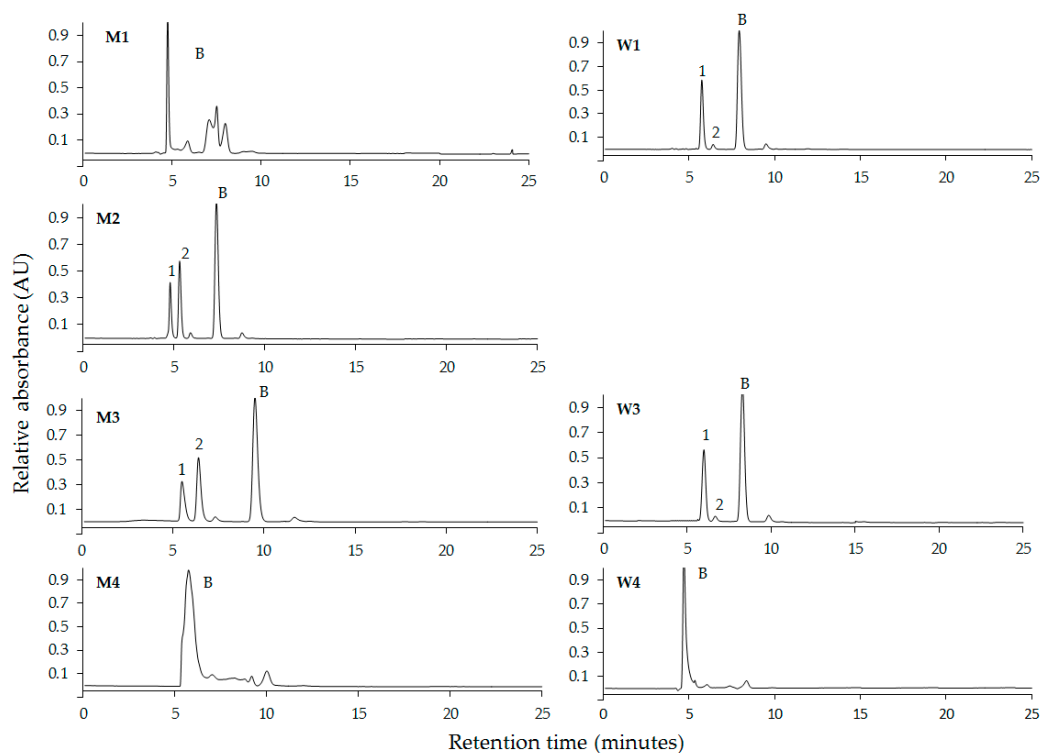

**Figure S6.** HPLC normalized chromatograms of MAAs identified in *Agarophyton vermiculophyllum* by seven methodological protocols using the Infinity Lab Poroshell 120 C18 column. The code of protocol is indicated based on extraction and re-dissolution solvents used (see figure 1 legend). Numbers indicate: 1 (palythine), 2 (asterina-330), and B (mixed unidentifiable peaks).

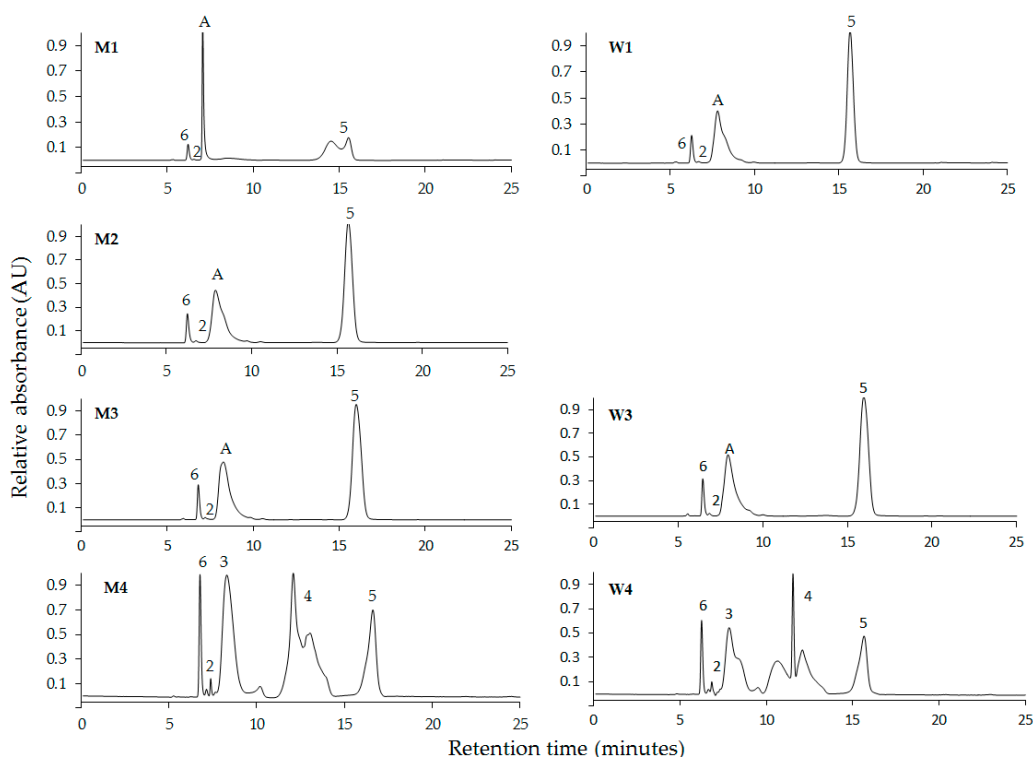

**Figure S7.** HPLC normalized chromatograms of MAAs identified in *Crassiphycus corneus* by seven methodological protocols using the Luna-C8 column. The code of protocol is indicated based on extraction and re-dissolution solvents used (see figure 1 legend). Numbers indicate: 2 (asterina-330), 3 (palythanol), 4 (shinorine), 5 (porphyra-334), 6 (palythine-serine), and A (mixture of palythanol and shinorine).

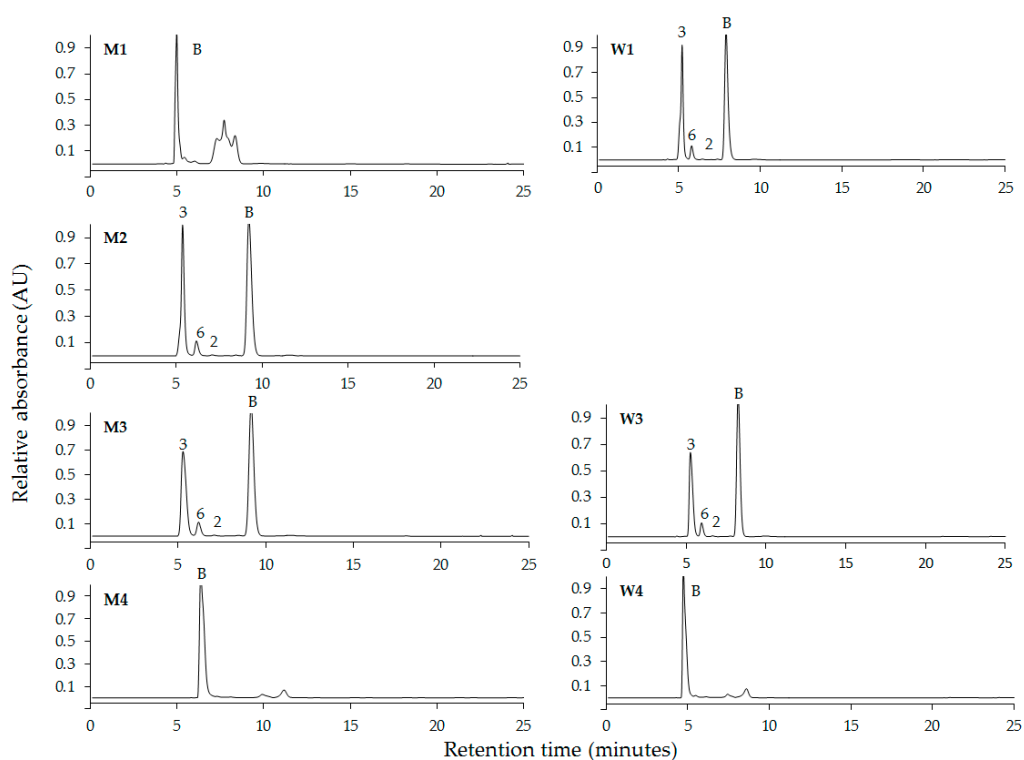

**Figure S8.** HPLC normalized chromatograms of MAAs identified in *Crassiphycus corneus* by seven methodological protocols using the Infinity Lab Poroshell 120 C18 column. The code of protocol is indicated based on extraction and re-dissolution solvents used (see figure 1 legend). Numbers indicate: 2 (asterina-330), 3 (palythanol), 6 (palythine-serine), and B (mixed unidentifiable peaks).

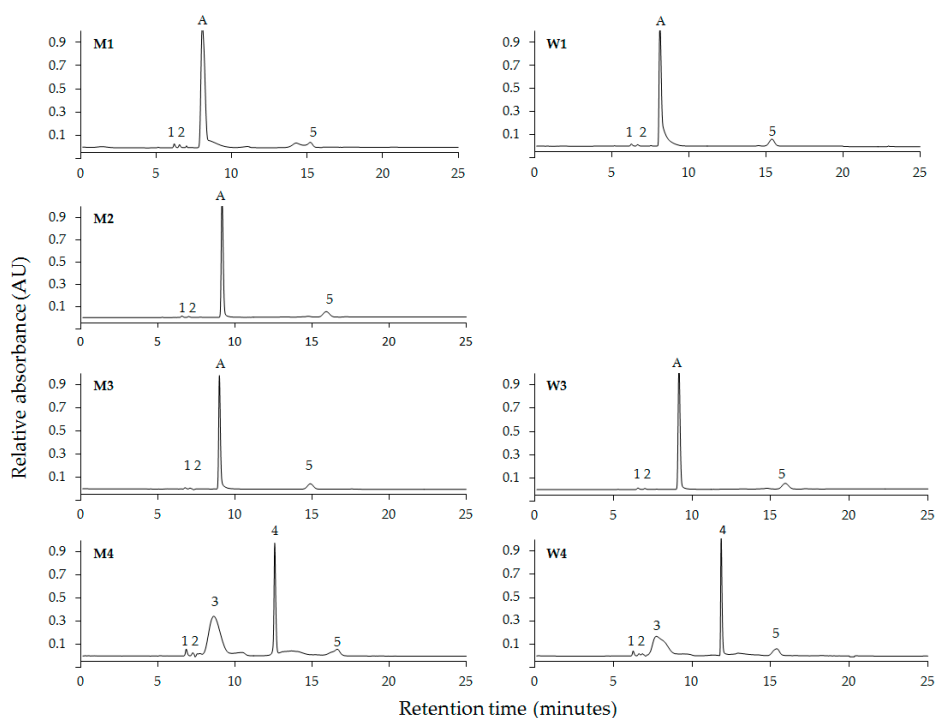

**Figure S9.** HPLC normalized chromatograms of MAAs identified in *Gracilariopsis longissima* by seven methodological protocols using the Luna-C8 column. The code of protocol is indicated based on extraction and re-dissolution solvents used (see figure 1 legend). Numbers indicate: 1 (palythine), 2 (asterina-330), 3 (palythanol), 4 (shinorine), 5 (porphyra-334), and A (mixture of palythanol and shinorine).

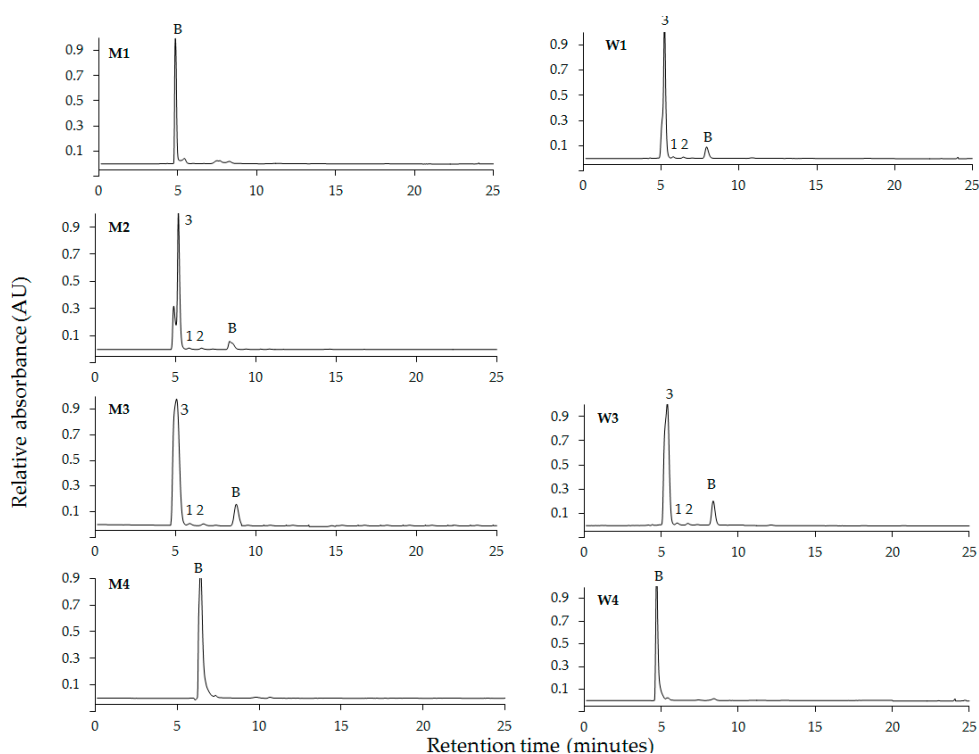

**Figure S10.** HPLC normalized chromatograms of MAAs identified in *Gracilariopsis longissima* by seven methodological protocols using the Infinity Lab Poroshell 120 C18 column. The code of protocol is indicated based on extraction and re-dissolution solvents used (see figure 1 legend). Numbers indicate: 1 (palythine), 2 (asterina-330), 3 (palythanol), and B (mixed unidentifiable peaks).
